# Supplementary material for: A 2D polyoxometalate-based complex: spin-canting and metamagnetism
Source: Royal Society of Chemistry journal article supplement (doi:10.1039/c0ce00905a), 2011-01-01
Supplement: c0ce00905a.pdf [file c0ce00905a.pdf]

# A 2D Polyoxometalate-Based Complex: Spin-Canting and Metamagnetism

Xiao-Yuan Wu,<sup>a</sup> Ping Dong,<sup>a</sup> Rongmin Yu,<sup>a</sup> Qi-Kai Zhang,<sup>a</sup>  
Xiaofei Kuang,<sup>a</sup> Shan-Ci Chen,<sup>a</sup> Qi-Pu Lin,<sup>a</sup> Can-Zhong Lu<sup>\*a</sup>

<sup>a</sup> *State Key Laboratory of Structural Chemistry, Fujian Institute of Research on the Structure of Matter, Chinese Academy of Sciences, Fuzhou, Fujian 350002, P. R. China*

\*The corresponding author, Fax: (+86)- 591-83714946; Tel: (+86)- 591-83705794;

E-mail: czlu@fjirsm.ac.cn

Preparation of complex **1**: A mixture of CuCl<sub>2</sub>·2H<sub>2</sub>O (0.200 g, 1.2 mmol), 2-Hptz (0.050 g, 0.34 mmol), (NH<sub>4</sub>)<sub>6</sub>Mo<sub>7</sub>O<sub>24</sub> (0.150 g, 0.12 mmol) and H<sub>2</sub>O (10 mL) was heated at 160 °C for 3 days in a sealed 23-mL Teflon-lined stainless steel vessel under autogenously pressure. Blue block crystals were isolated after the reaction solution was cooled to room temperature within 1 day, washed with water, and air-dried. Yield: 0.140 g (45% based on ligand). Elemental analysis for C<sub>6</sub>H<sub>9</sub>Cu<sub>2</sub>Mo<sub>4</sub>N<sub>5</sub>O<sub>16</sub>: calcul. (%): H 0.99, C 7.85, N 7.63; found (%): H 0.77 C 7.87 N 7.65. IR data (KBr, cm<sup>-1</sup>): 3426m, 3095w, 2787w, 1616w, 1440m, 962s, 937s, 919s, 898w, 851s, 828w, 722w, 681s, 523m.

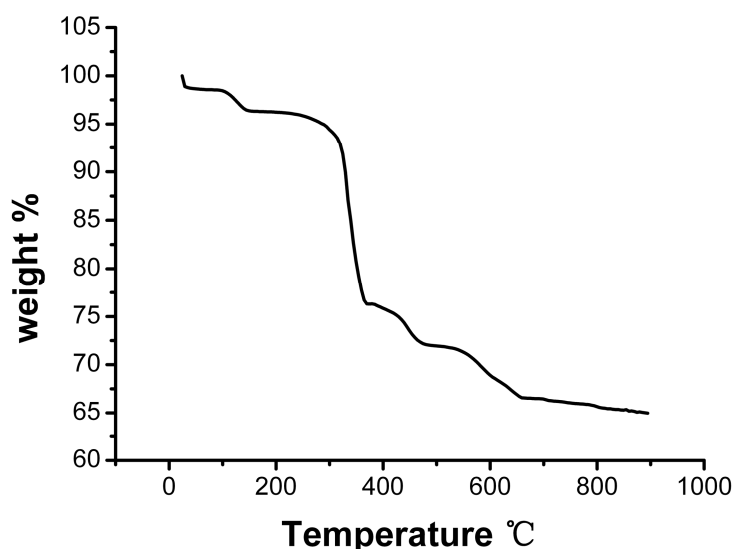

Fig. S1 The TGA curve of **1**

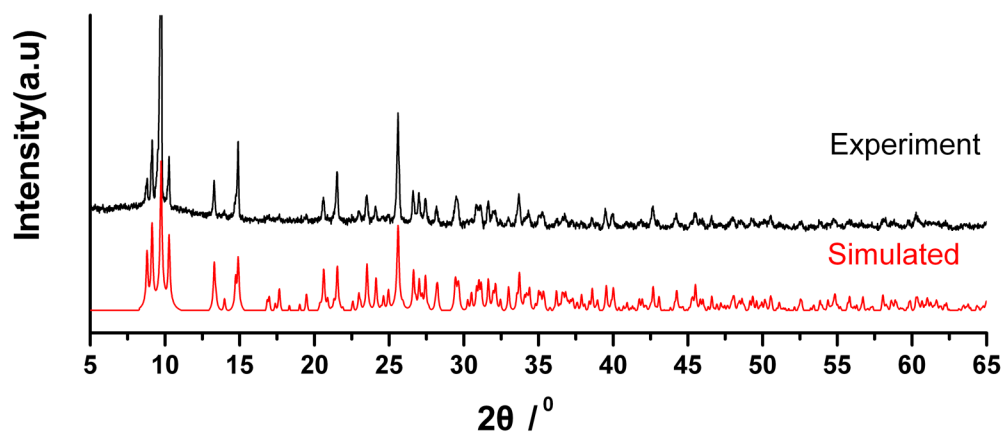

Fig. S2 The PXRD pattern of **1**

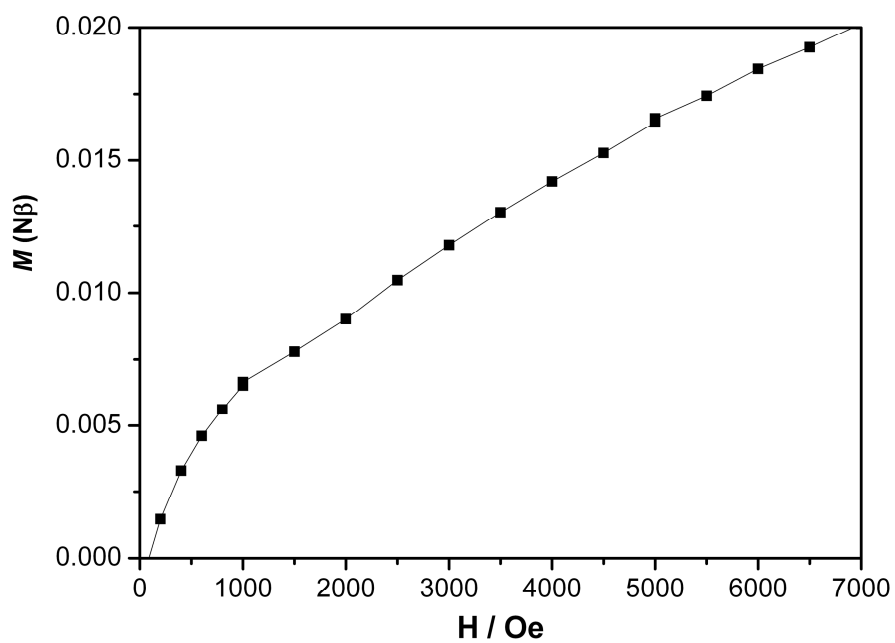

Fig. S3 the field dependent isothermal magnetization for **1** at 2 K from 0 to 7000 Oe

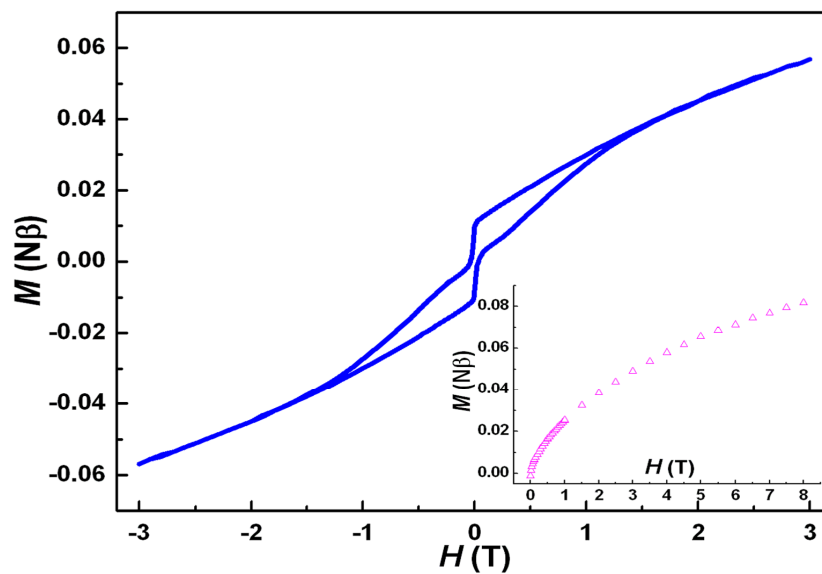

Fig. S4 The hysteresis loop measured at 2 K in the  $\pm 3$  T range. The insert denotes the field dependent isothermal magnetization for **1** at 2 K from 0 to 8 T

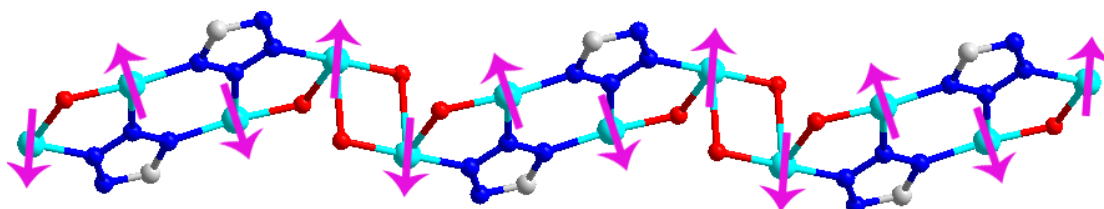

Fig. S5 Proposed spin configuration of Z-type chain for **1**. The magenta arrows represent individual moments of spin carriers.
